# Supplementary material
Source: MDPI journal article supplement (https://www.mdpi.com/2071-1050/14/23/16017)
Supplement: s1 [file s1 › sustainability-2012365-supplementary.pdf]

*Supplementary Material to:*

## **First evidence of microplastic presence in bed load sediments of a small urban stream in Warsaw**

by Adam Krajewski, Agnieszka Hejduk and Leszek Hejduk

**Figures:**

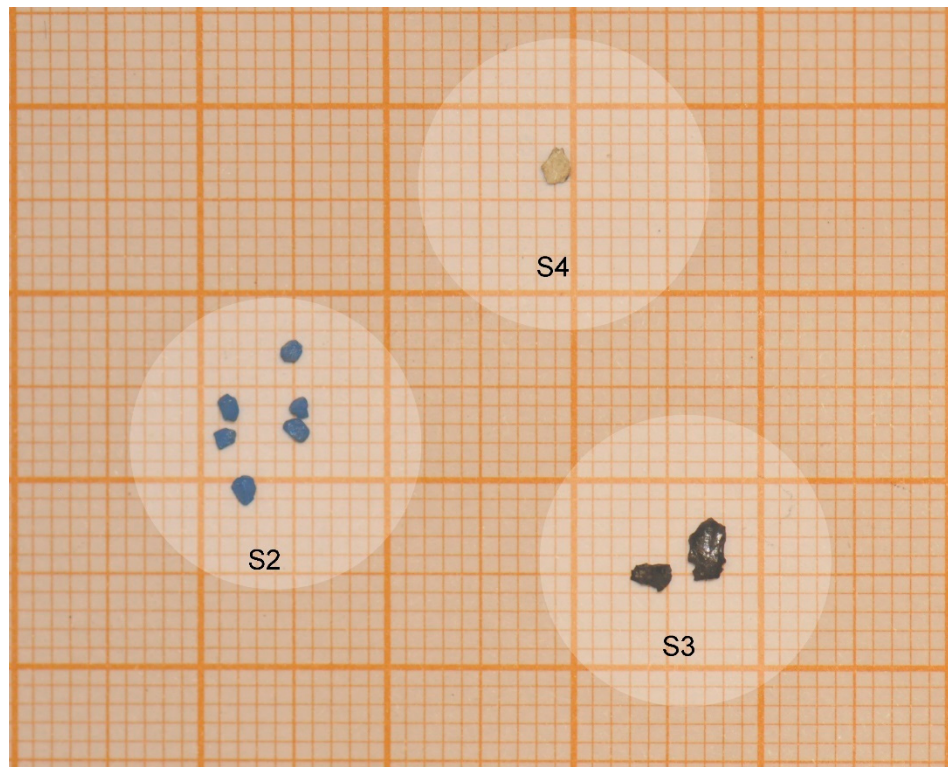

**Figure S1.** Macro photo of microplastic particles, captured on sieve. The background mesh is 1 mm. Sampling sites: S2, S3 and S4; the background mesh is 1 mm.

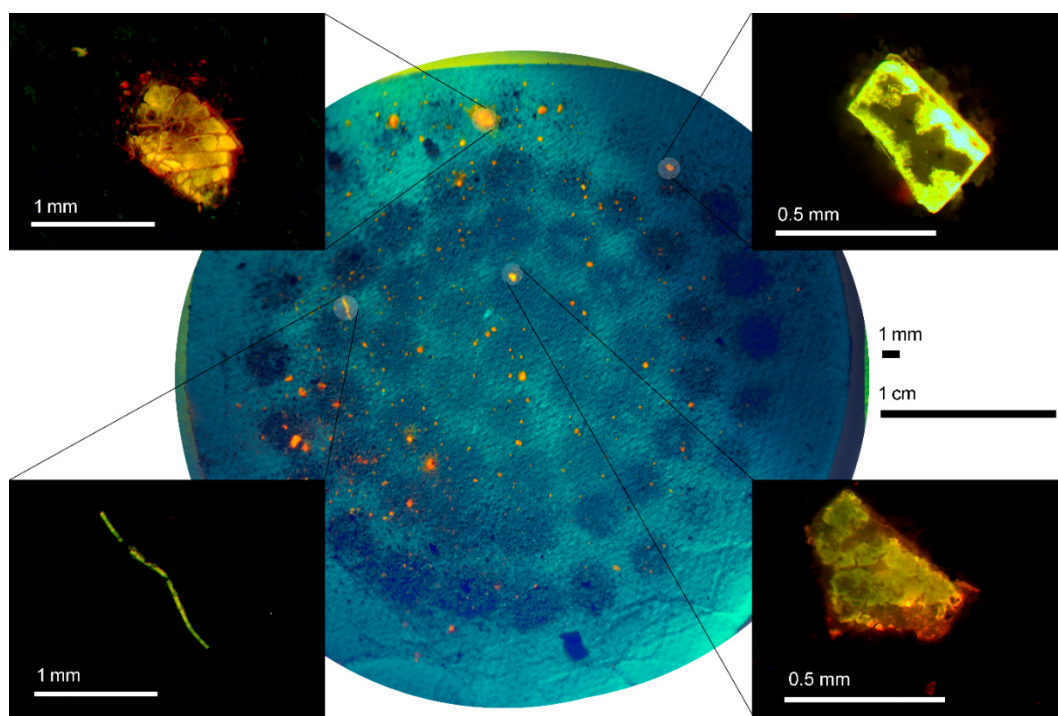

**Figure S2.** Macro (in the center) and microscopic (in the corners) photos of stained microplastic particles, captured on filter and observed under blue (470 nm) light trough orange filter. Sampling site S2. The contrast has been increased to make the photo easier to read.

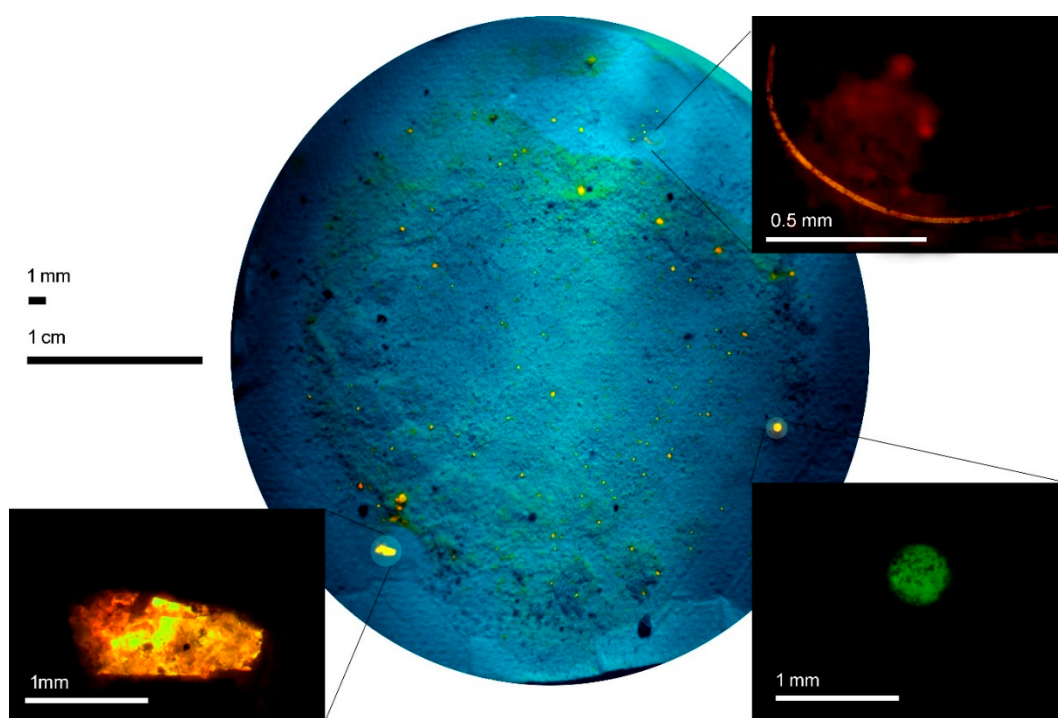

**Figure S3.** Macro (in the center) and microscopic (in the corners) photos of stained microplastic particles, captured on filter and observed under blue (470 nm) light trough orange filter. Sampling site S3. The contrast has been increased to make the photo easier to read

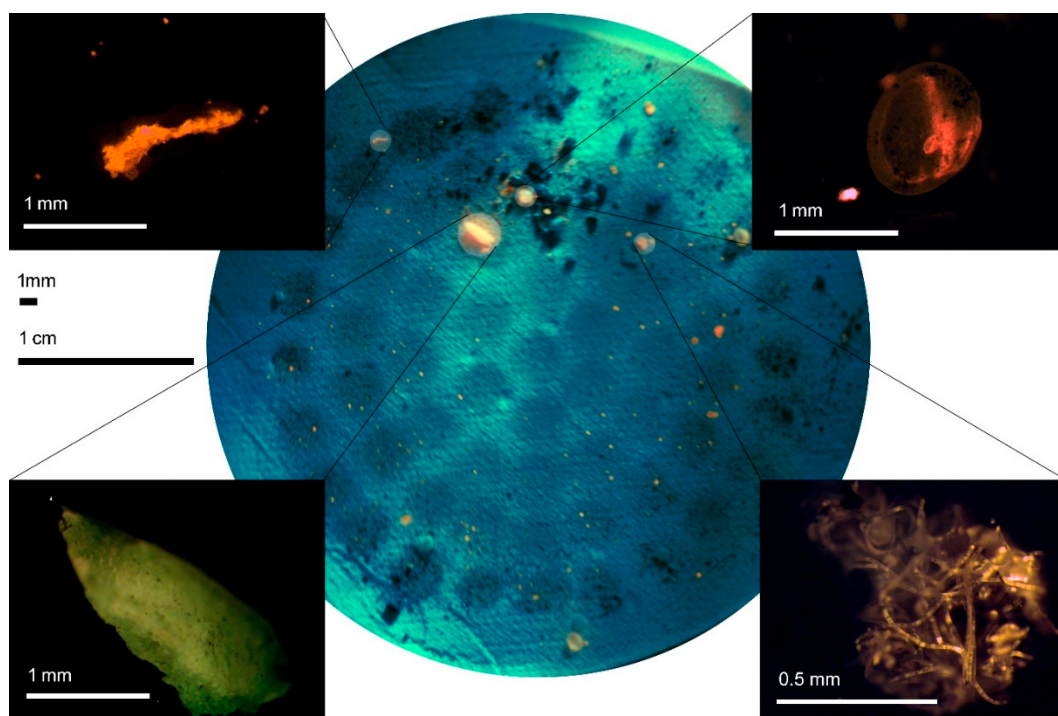

**Figure S4.** Macro (in the center) and microscopic (in the corners) photos of stained microplastic particles, captured on filter and observed under blue (470 nm) light trough orange filter. Sampling site S4. The contrast has been increased to make the photo easier to read

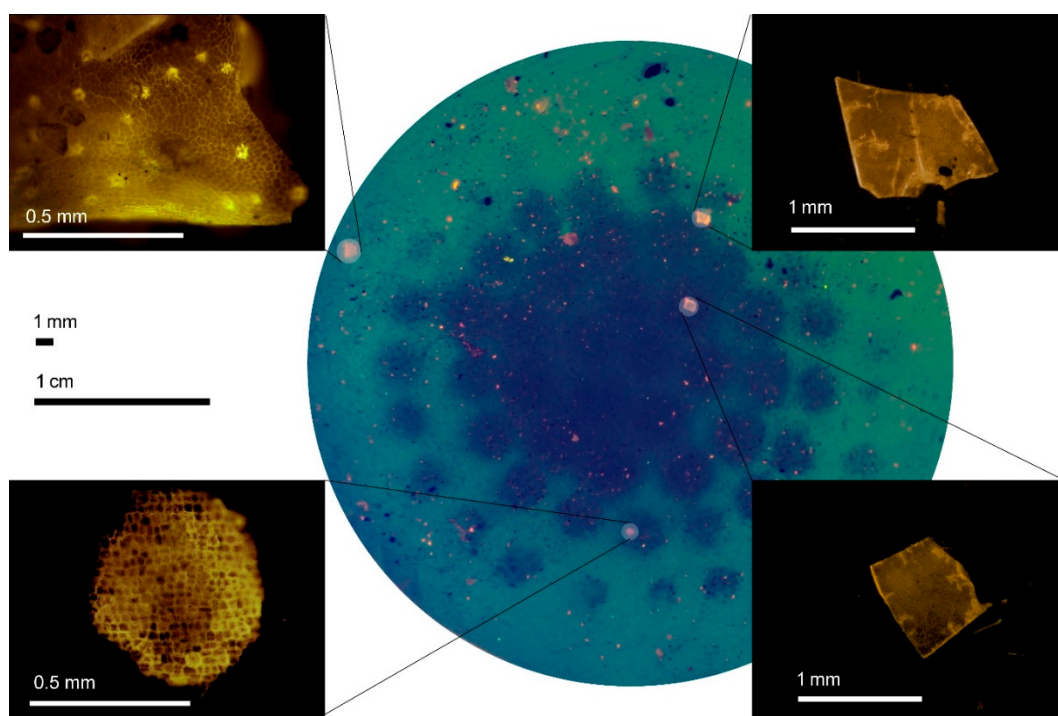

**Figure S5.** Macro (in the center) and microscopic (in the corners) photos of stained particles, captured on filter and observed under blue (470 nm) light trough orange filter. In this sample, the organic matter reduction stage was omitted. On the left - organic matter, on the right - plastic. Number of recognized particles amounts to 404 pieces. Sampling site S2. The contrast has been increased to make the photo easier to read

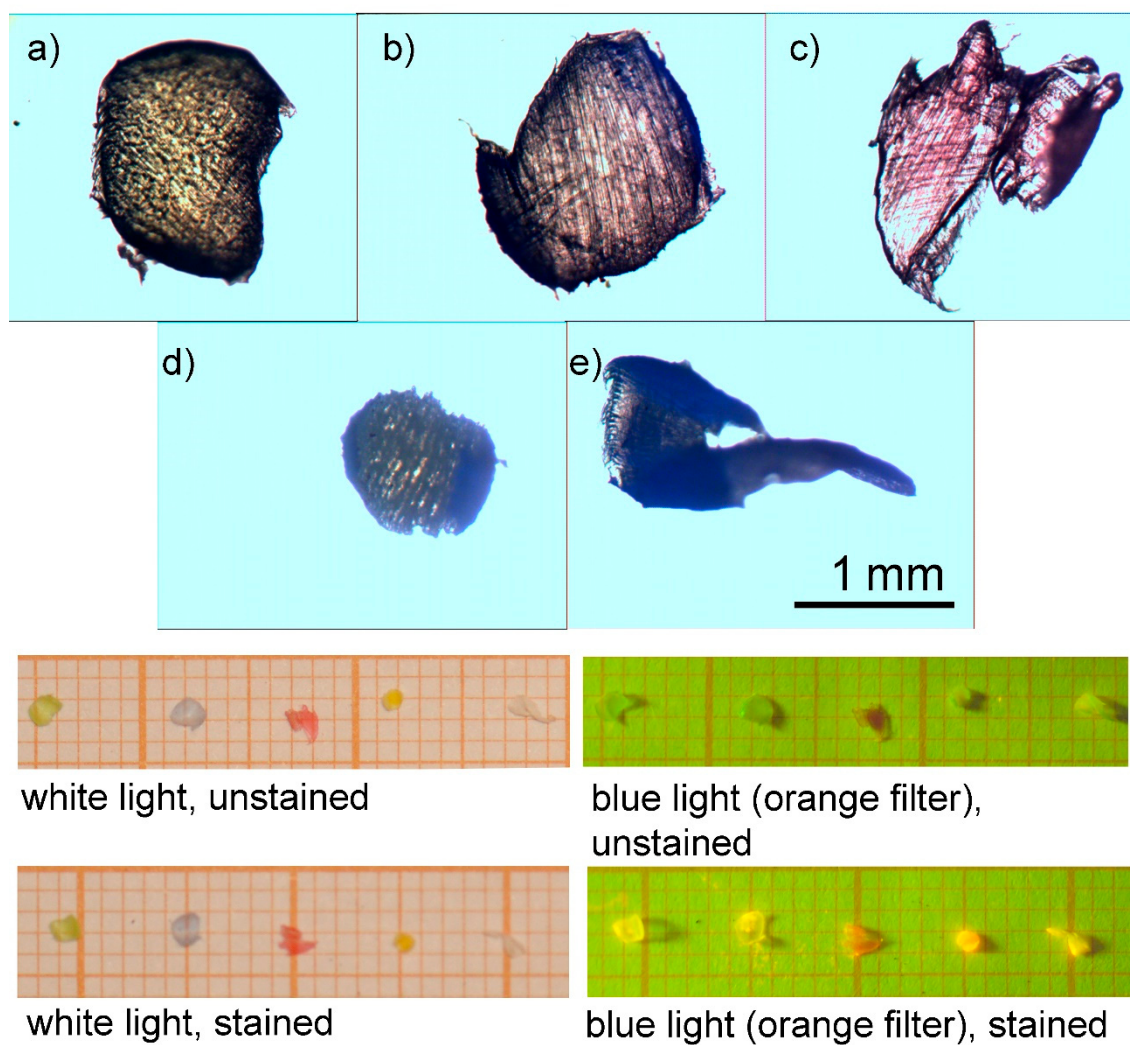

**Figure S6.** Fragments of virgin polyethylene, (PET) coming from bottle caps. Microscopic photos (taken under white light) of PET in differ colors: a) green, b) blue, c) red, d) yellow, e) white. Macro photography (bottom part) taken under various conditions.

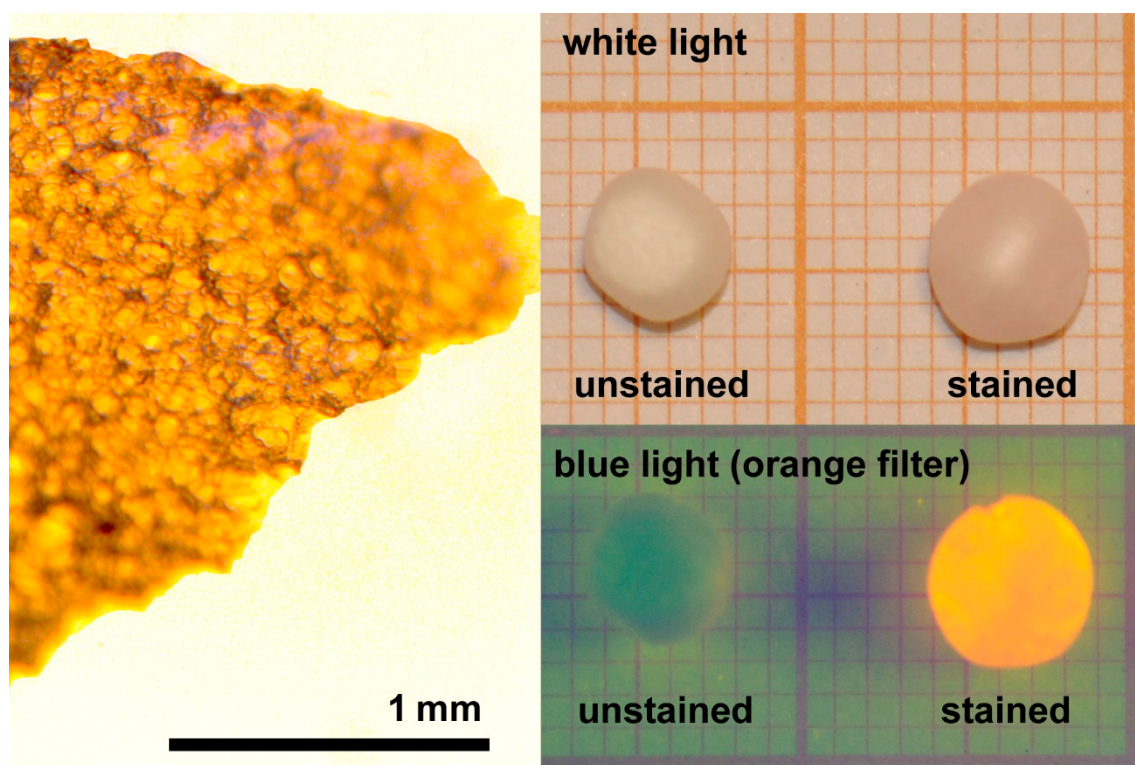

**Figure S7.** Fragments of virgin expanded polystyrene (Styrofoam, ESP). Microscopic photos (taken under white light) of EPS (on the left). Macro photography (on the right) taken under various conditions.

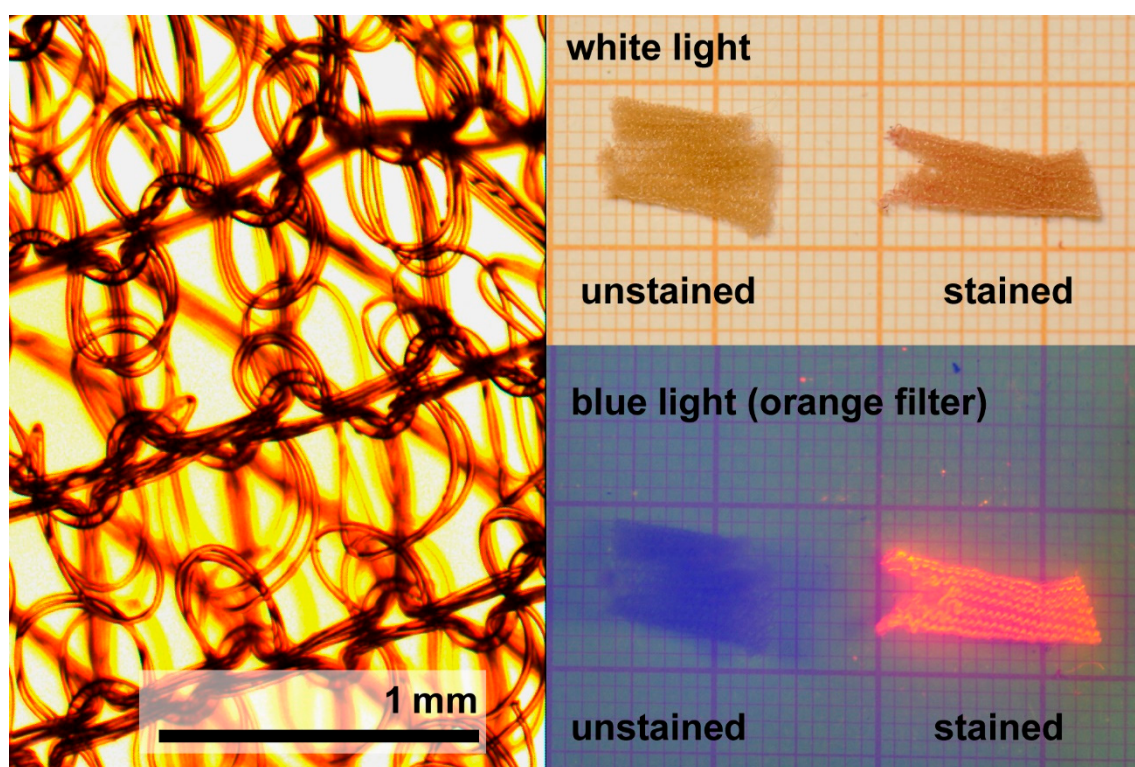

**Figure S8.** Fragments of virgin nylon (mesh). Microscopic photos (taken under white light) of mesh (on the left). Macro photography (on the right) taken under various conditions.

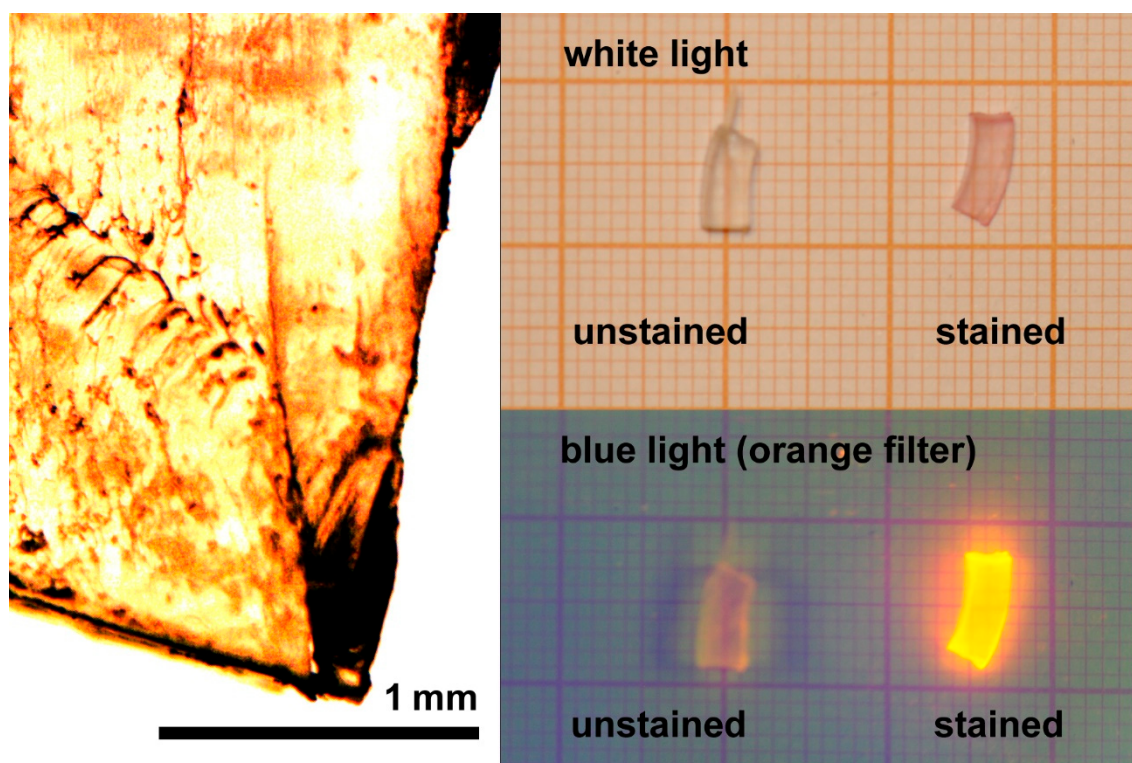

**Figure S9.** Fragments of virgin polyvinyl chloride (PVC, transparent). Microscopic photos (taken under white light) of PVC (on the left). Macro photography taken under various conditions.

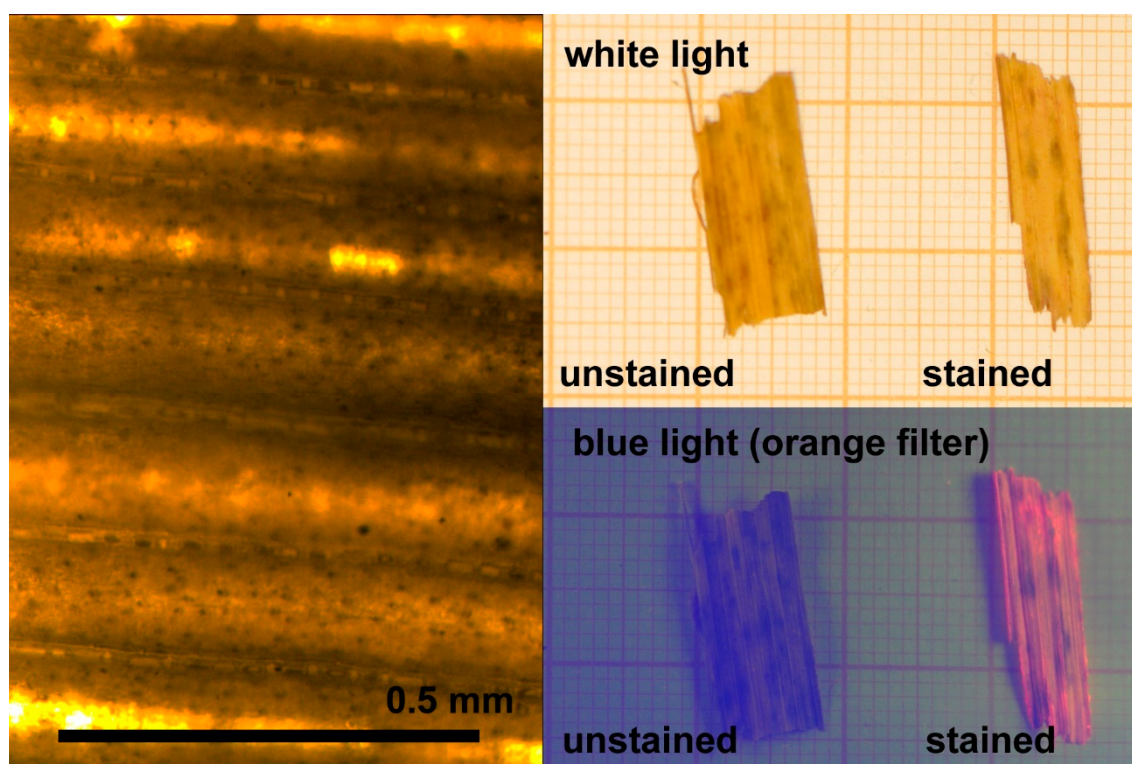

**Figure S10.** Reed leaf fragment. Microscopic photos (taken under white light) of the leaf (on the left). Macro photography (on the right) taken under various conditions.

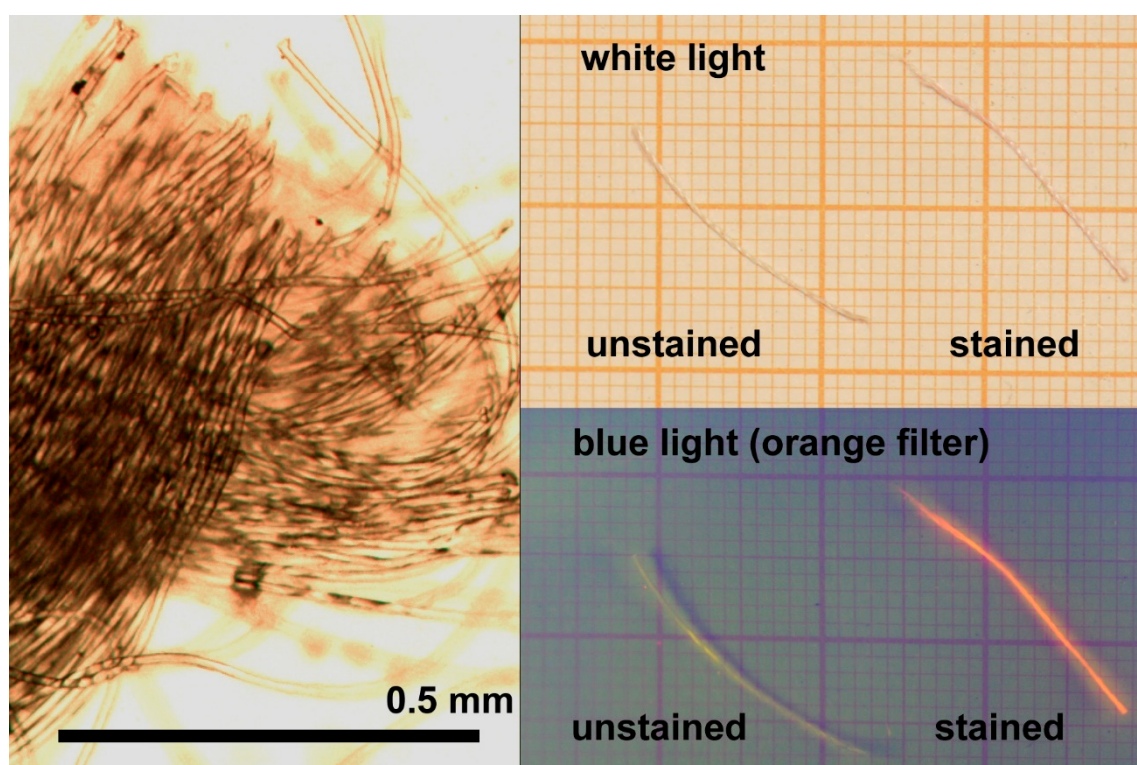

**Figure S11.** White cotton fiber. Microscopic photos (taken under white light) of the fiber (on the left). Macro photography (on the right) taken under various conditions.

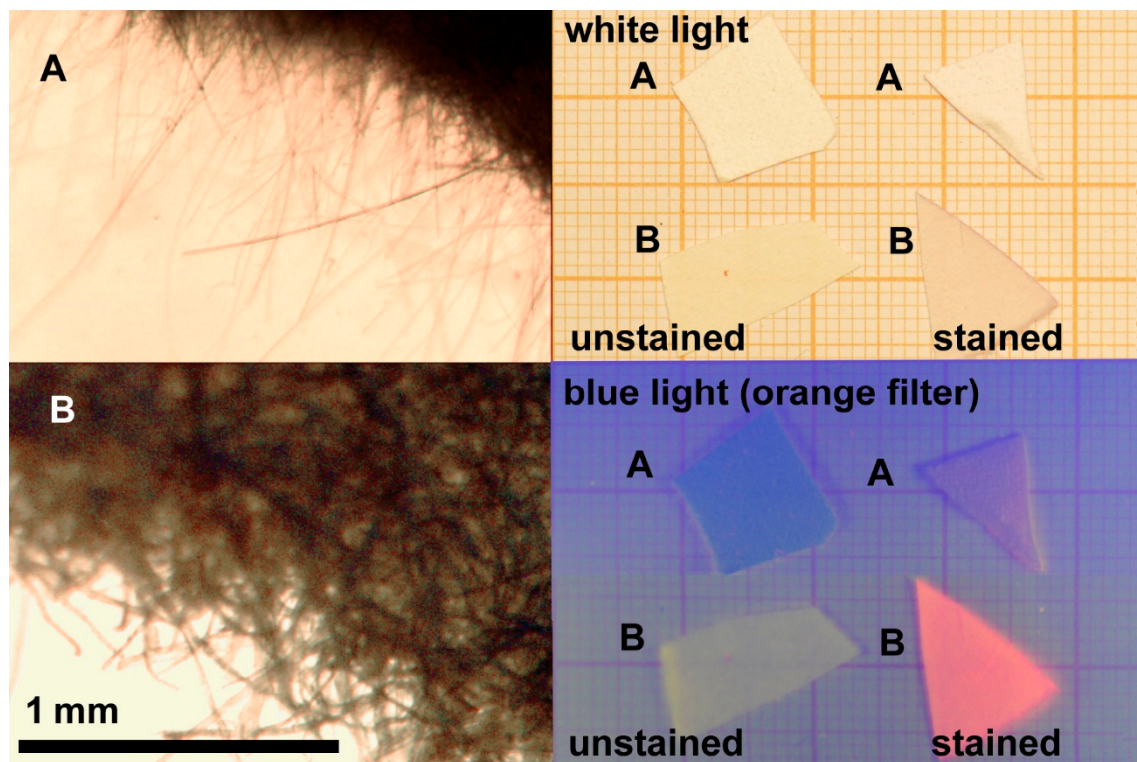

**Figure S12.** Cellulose filter (A) and glass fiber filters (B). Microscopic photos (taken under white light) of the filters (on the left). Macro photography (on the right) taken under various conditions.
